# Supplementary material
Source: PubMed Central journal article supplement (PMC2847348)
Supplement: NIHMS185688-supplement-supplementary.pdf [file NIHMS185688-supplement-supplementary.pdf]

Supplementary Information

Table 1. List of Site-directed mutagenesis oligonucleotides used for introducing triple alanine substitutions into the cytoplasmic tail of ANTXR1-sv1 for actin association assays. The complements for each oligonucleotide are not shown.

| <b>Mutant</b> | <b>Oligonucleotide</b>                                |
|---------------|-------------------------------------------------------|
| 370-372       | 5'-GGAAGAAGATGATGATGGTGCGGCTGCGAAAAAGTGGCCAACGGTAG-3' |
| 373-375       | 5'-GATGATGGTCTGCCTAAGGCAGCGGCGCCAACGGTAGACGCCTC-3'    |
| 376-378       | 5'-CTGCCTAAGAAAAAGTGGGCAGCGGCAGACGCCTCTTATTATGGTG-3'  |
| 379-381       | 5'-AAGAAAGTGGCCAACGGTAGCCGCCGCTTATTATGGTGGGAGAGG-3'   |
| 382-384       | 5'-CAACGGTAGACGCCTCTGCTGCTGCTGGGAGAGGCGTTGGAGG-3'     |
| 385-387       | 5'-GACGCCTCTTATTATGGTGCGGCAGCCGTTGGAGGCATTAAG-3'      |
| 388-390       | 5'-CTTATTATGGTGGGAGAGGCGCTGCAGCCATTAAGAATGGAGG-3'     |
| 391-393       | 5'-GGAGAGGCGTTGGAGGCGCTGCAGCAATGGAGGTTTCGTTGGGG-3'    |
| 394-396       | 5'-GTTGGAGGCATTAAGAGAGCGGCGGCTCGTTGGGGAGAAAAGGG-3'    |
| 397-399       | 5'-GGCATTAAGAATGGAGGTTGCTGCGGCAGAAAAGGGCTCCACAGAAG-3' |
| 400-402       | 5'-GGAGGTTTCGTTGGGGAGCAGCGGCCTCCACAGAAGAAGGTGC-3'     |
| 403-405       | 5'-GTTGGGGAGAAAAGGGCGCCGCAGCAGAAGGTGCTAAGTTGG-3'      |
| 406-408       | 5'-GAAAAGGGCTCCACAGAAGCAGCTGCTAAGTTGGAAAAGGCAAAG-3'   |
| 409-411       | 5'-CTCCACAGAAGAAGGTGCTGCGGCGGCAAAGGCAAAGAATGCAAG-3'   |
| 412-414       | 5'-GAAGGTGCTAAGTTGGAAGCGGCAGCGAATGCAAGAGTCAAGATG-3'   |
| 415-417       | 5'-CTAAGTTGGAAAAGGCAAAGGCTGCAGCAGTCAAGATGCCGGAGC-3'   |
| 418-420       | 5'-GGCAAAGAATGCAAGAGCCGCGGCGCCGGAGCAGGAATATGAATTC-3'  |
